# Supplementary material
Source: ML conference proceedings conference paper supplement (https://openreview.net/forum?id=0pbxX2jatP)

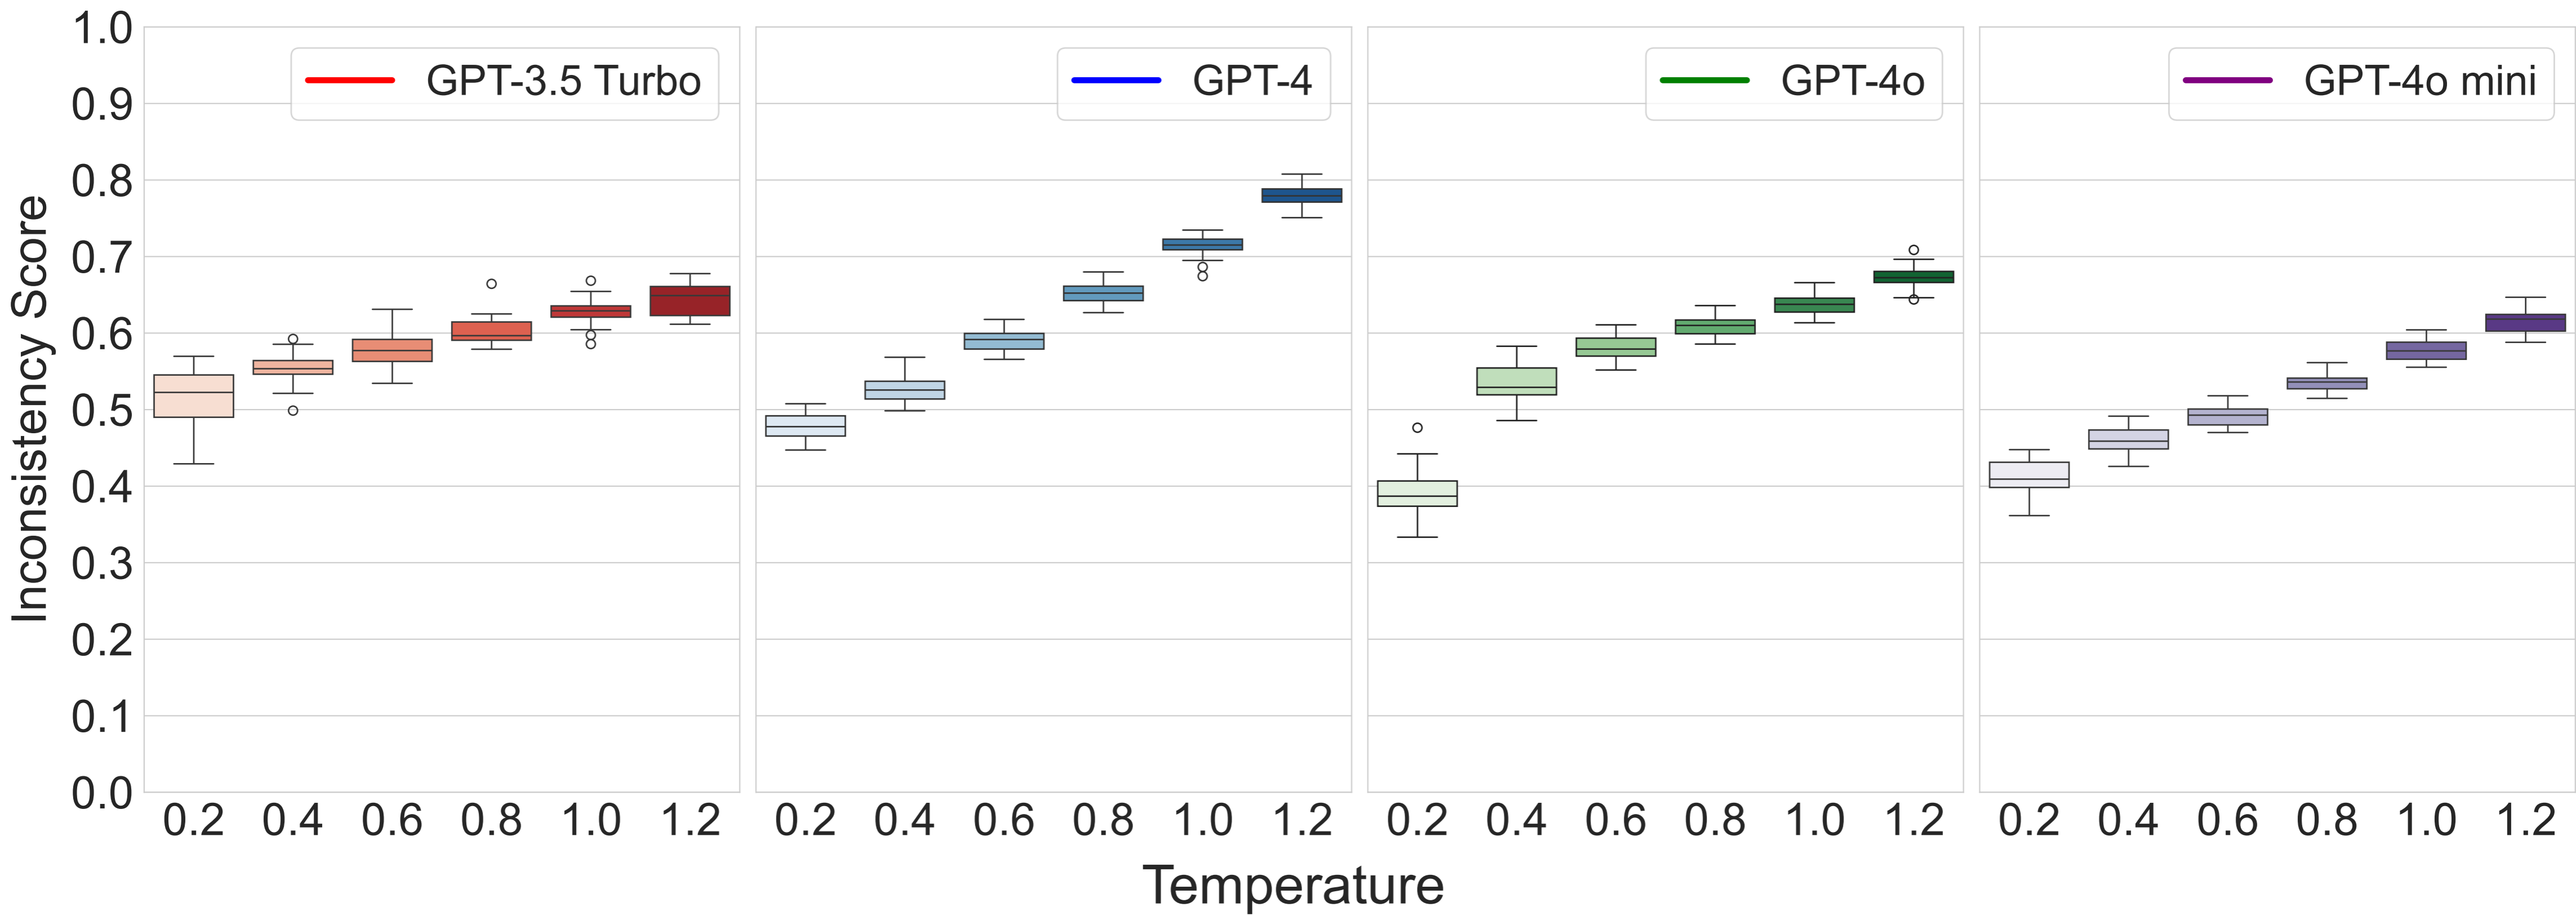

Supplement: supplementary_material [file attachment]

# Initial Setting

Inconsistency Score

0.35  
0.30  
0.25  
0.20  
0.15  
0.10  
0.05  
0.00

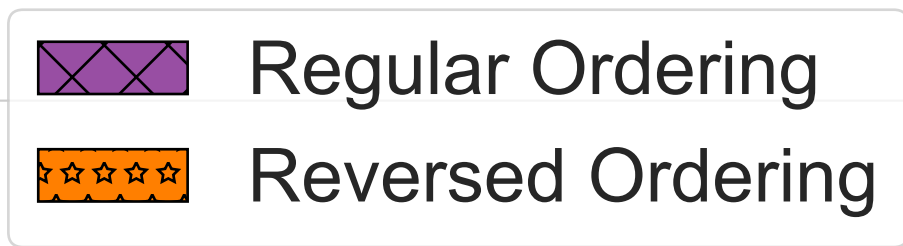

GPT-4o mini

Supplement: supplementary_material [file attachment]

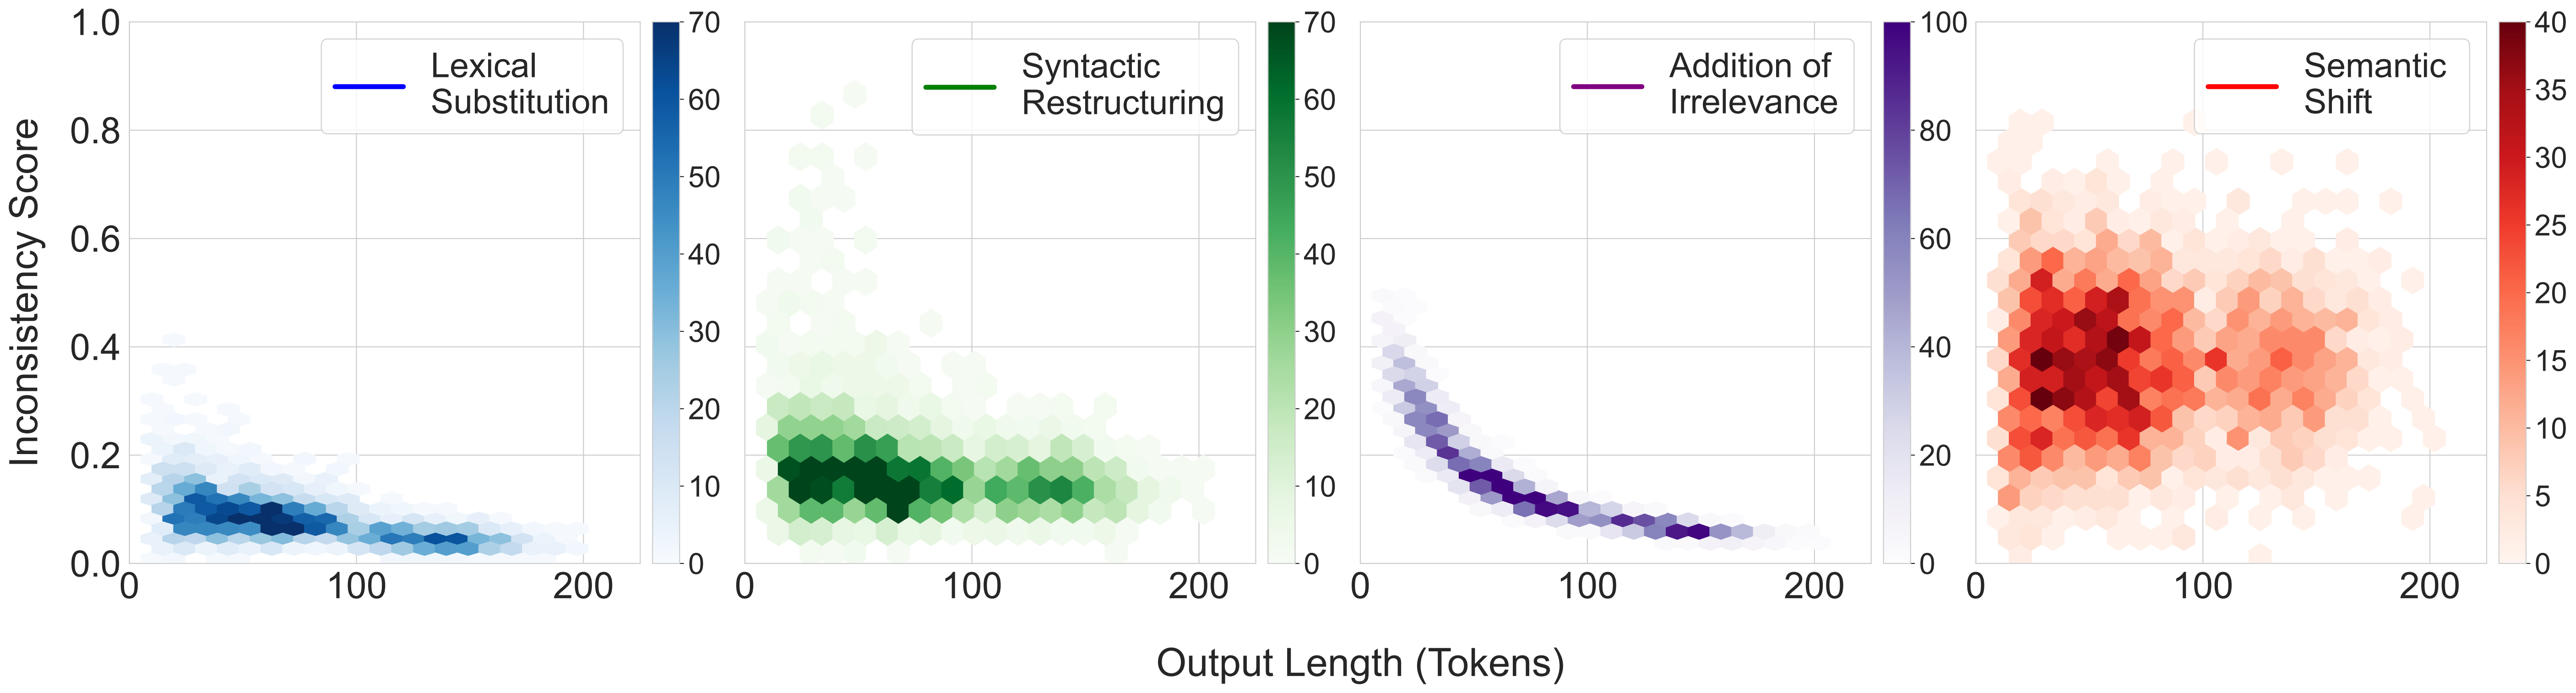

Supplement: supplementary_material [file attachment]

Inconsistency Score

Initial Setting

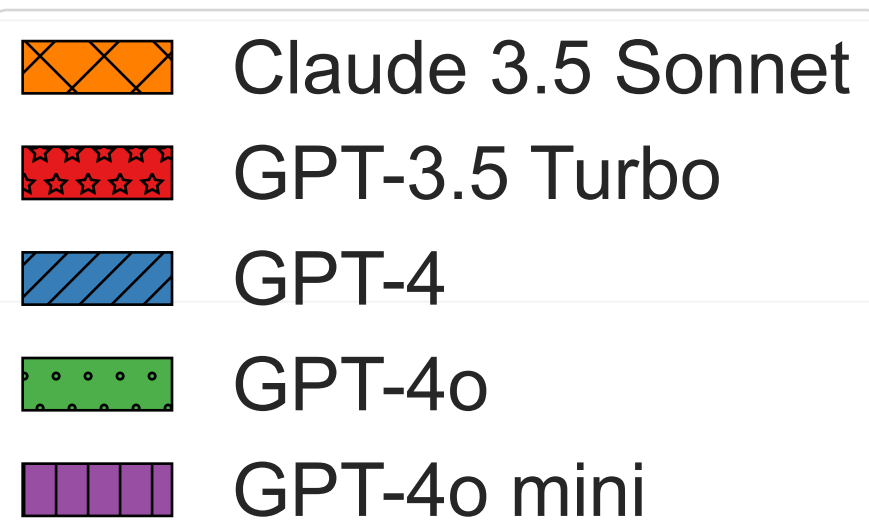

Continuations

Status Quo

Revisionist

Supplement: supplementary_material [file attachment]

Inconsistency Score

Initial Setting



Continuations

Status Quo

Revisionist

Supplement: supplementary_material [file attachment]

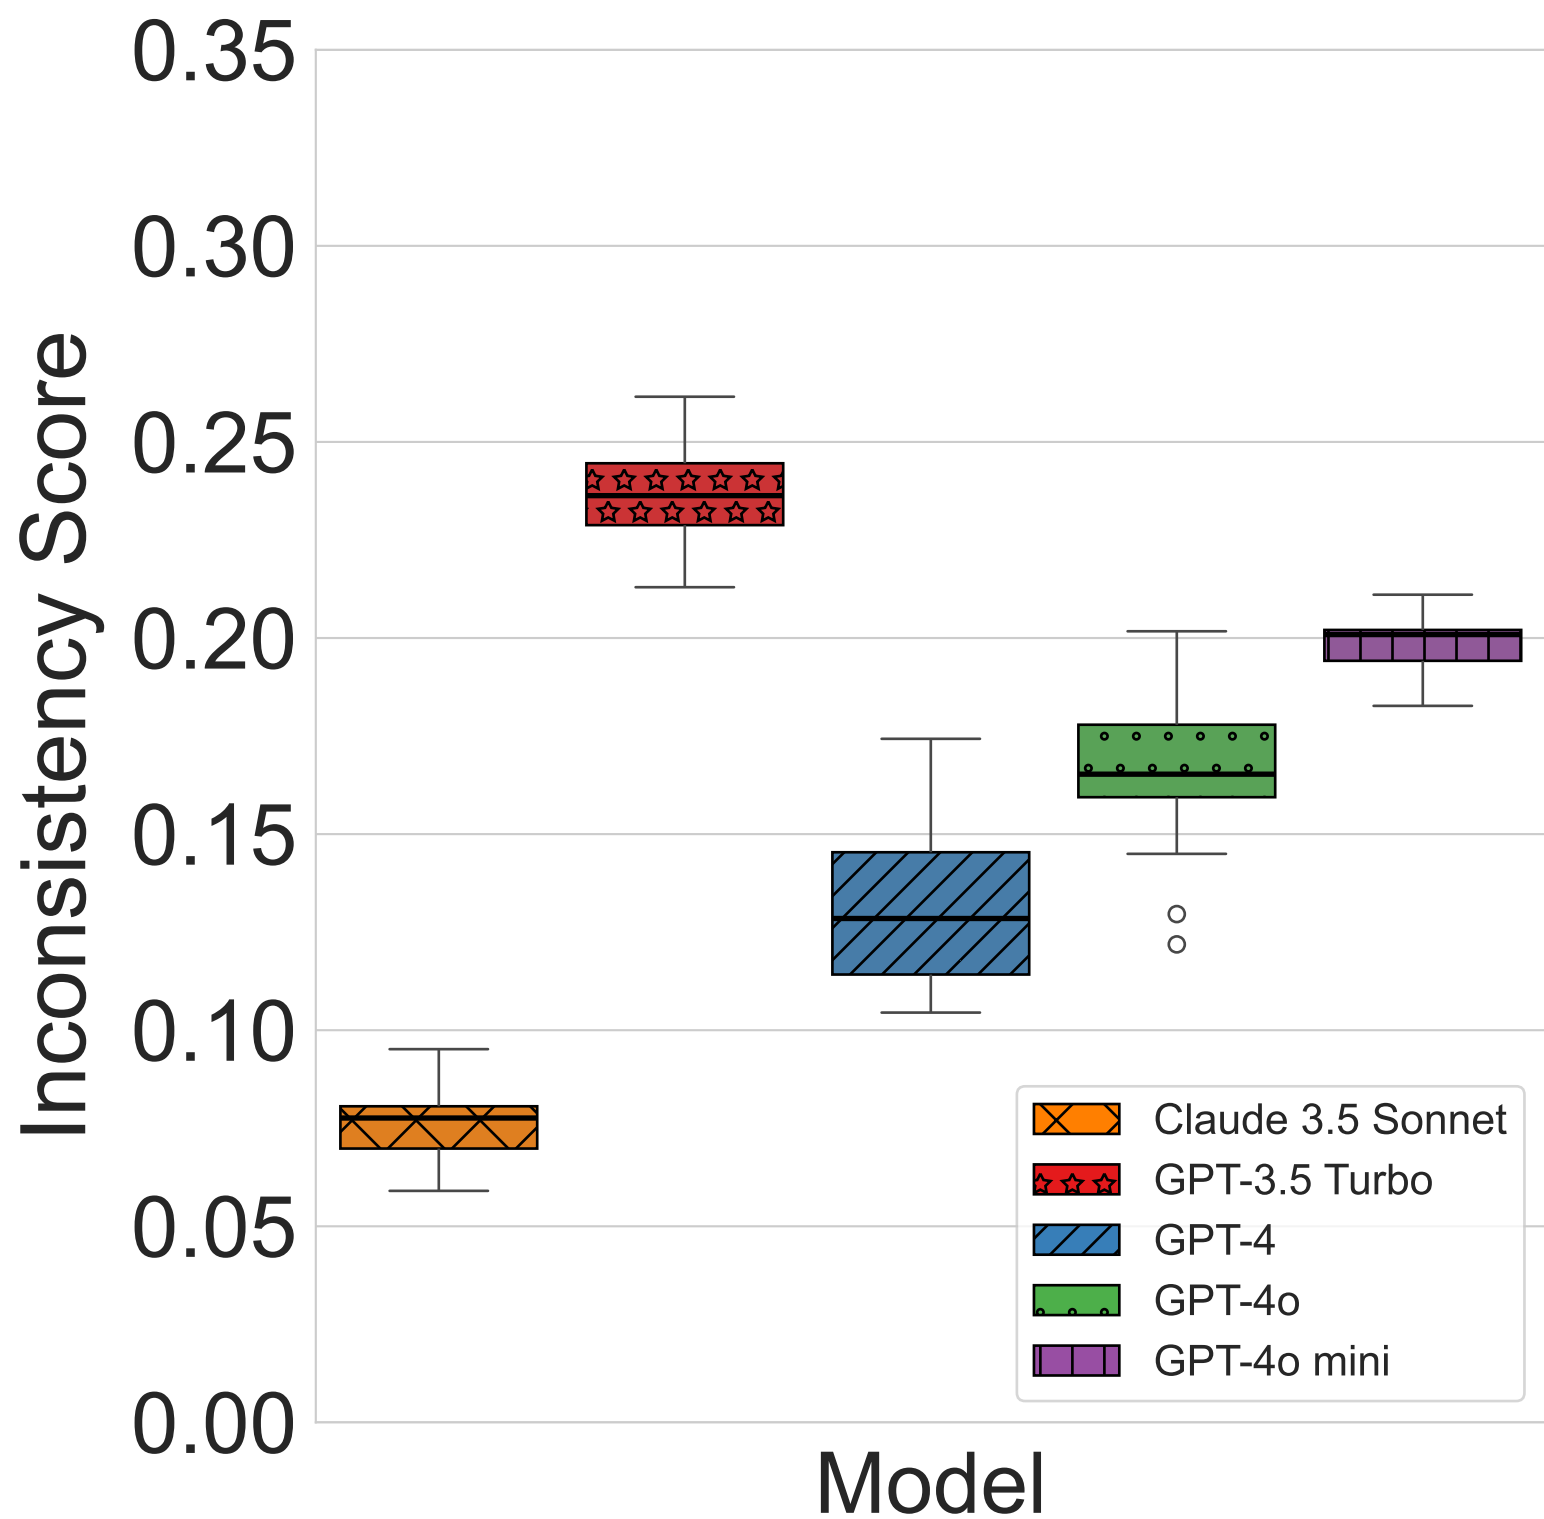

Supplement: supplementary_material [file attachment]

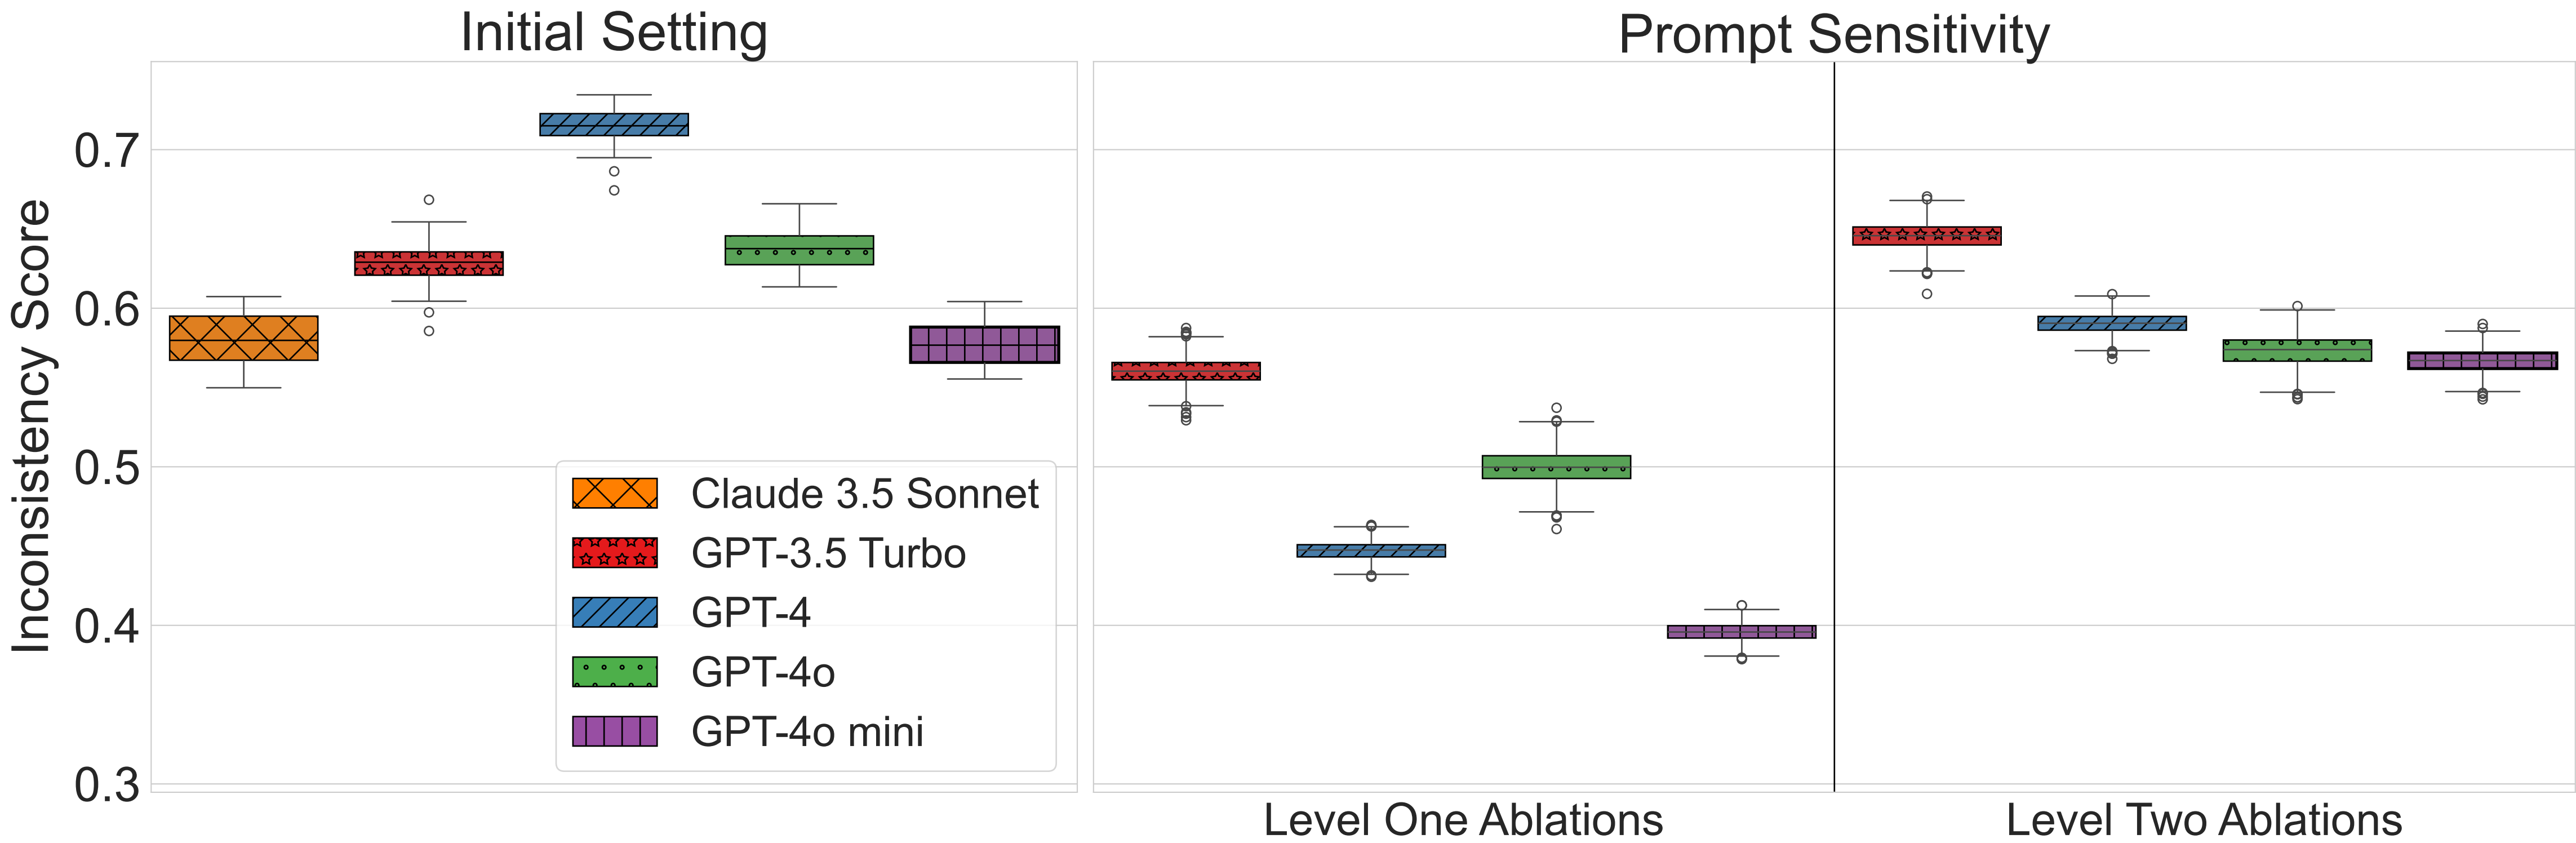

Supplement: supplementary_material [file attachment]
